# Supplementary material for: Efficient monomolecular white emission of phenothiazine boronic ester derivatives with room temperature phosphorescence
Source: Royal Society of Chemistry journal article supplement (doi:10.1039/d2tc01612e), 2022-01-01
Supplement: d2tc01612e1.pdf [file d2tc01612e1.pdf]

## Efficient monomolecular white emission of phenothiazine boronic ester derivatives with room temperature phosphorescence

Faizal Khan<sup>a</sup>, Lesia Volyniuk,<sup>b</sup> Melika Ghasemi,<sup>b</sup> Dmytro Volyniuk,<sup>b</sup> Juozas Vidas  
Grazulevicius<sup>b</sup>, Rajneesh Misra<sup>a\*</sup>

### Supporting Information

| Contents                                                                                                                                                                                                                      | Page        |
|-------------------------------------------------------------------------------------------------------------------------------------------------------------------------------------------------------------------------------|-------------|
| <b>Experimental Section</b>                                                                                                                                                                                                   | 2           |
| <b>Figure S1.</b> <sup>1</sup> H NMR of <b>H-PTZ-Bpin</b> (CDCl <sub>3</sub> , 500 MHz)                                                                                                                                       | 3           |
| <b>Figure S2.</b> <sup>13</sup> C{ <sup>1</sup> H} NMR of <b>H-PTZ-Bpin</b> (CDCl <sub>3</sub> , 126 MHz)                                                                                                                     | 3           |
| <b>Figure S3.</b> <sup>1</sup> H NMR of <b>CHO-PTZ-Bpin</b> (CDCl <sub>3</sub> , 500 MHz)                                                                                                                                     | 4           |
| <b>Figure S4.</b> <sup>13</sup> C{ <sup>1</sup> H} NMR of <b>CHO-PTZ-Bpin</b> (CDCl <sub>3</sub> , 126 MHz)                                                                                                                   | 4           |
| <b>Figure S5.</b> <sup>1</sup> H NMR of <b>CN-PTZ-Bpin</b> (CDCl <sub>3</sub> , 500 MHz)                                                                                                                                      | 5           |
| <b>Figure S6.</b> <sup>13</sup> C{ <sup>1</sup> H} NMR of <b>CN-PTZ-Bpin</b> (CDCl <sub>3</sub> , 126 MHz)                                                                                                                    | 5           |
| <b>Figure S7.</b> <sup>1</sup> H NMR of <b>PhCN-PTZ-Bpin</b> (CDCl <sub>3</sub> , 500 MHz)                                                                                                                                    | 6           |
| <b>Figure S8.</b> <sup>13</sup> C{ <sup>1</sup> H} NMR of <b>PhCN-PTZ-Bpin</b> (CDCl <sub>3</sub> , 126 MHz)                                                                                                                  | 6           |
| <b>Figure 9.</b> HRMS of <b>H-PTZ-Bpin</b>                                                                                                                                                                                    | 7           |
| <b>Figure 10.</b> HRMS of <b>CHO-PTZ-Bpin</b>                                                                                                                                                                                 | 7           |
| <b>Figure 11.</b> HRMS of <b>CN-PTZ-Bpin</b>                                                                                                                                                                                  | 7           |
| <b>Figure 12.</b> HRMS of <b>PhCN-PTZ-Bpin</b>                                                                                                                                                                                | 8           |
| <b>Crystallographic data</b>                                                                                                                                                                                                  | <b>8–12</b> |
| <b>Figure S16.</b> PL spectra (left) and PL decay curves (right) of non-deoxygenated (air) and deoxygenated (deox.) THF solutions of <b>CHO-PTZ-Bpin</b> , <b>CN-PTZ-Bpin</b> , and <b>PhCN-PTZ-Bpin</b> at room temperature  | 13          |
| <b>Figure S17.</b> PL and phosphorescence spectra of <b>CHO-PTZ-Bpin</b> , <b>CN-PTZ-Bpin</b> , and <b>PhCN-PTZ-Bpin</b> in THF at 77K. Phosphorescence was separated from fluorescence using a delay of 1ms after excitation | 14          |
| <b>Figure S18.</b> PL spectra of low-concentrated (5wt.%) dispersions of <b>CHO-PTZ-Bpin</b> , <b>CN-PTZ-Bpin</b> , and <b>PhCN-PTZ-Bpin</b> in ZEONEX under air and vacuum at room temperature.                              | 15          |

## Experimental Section

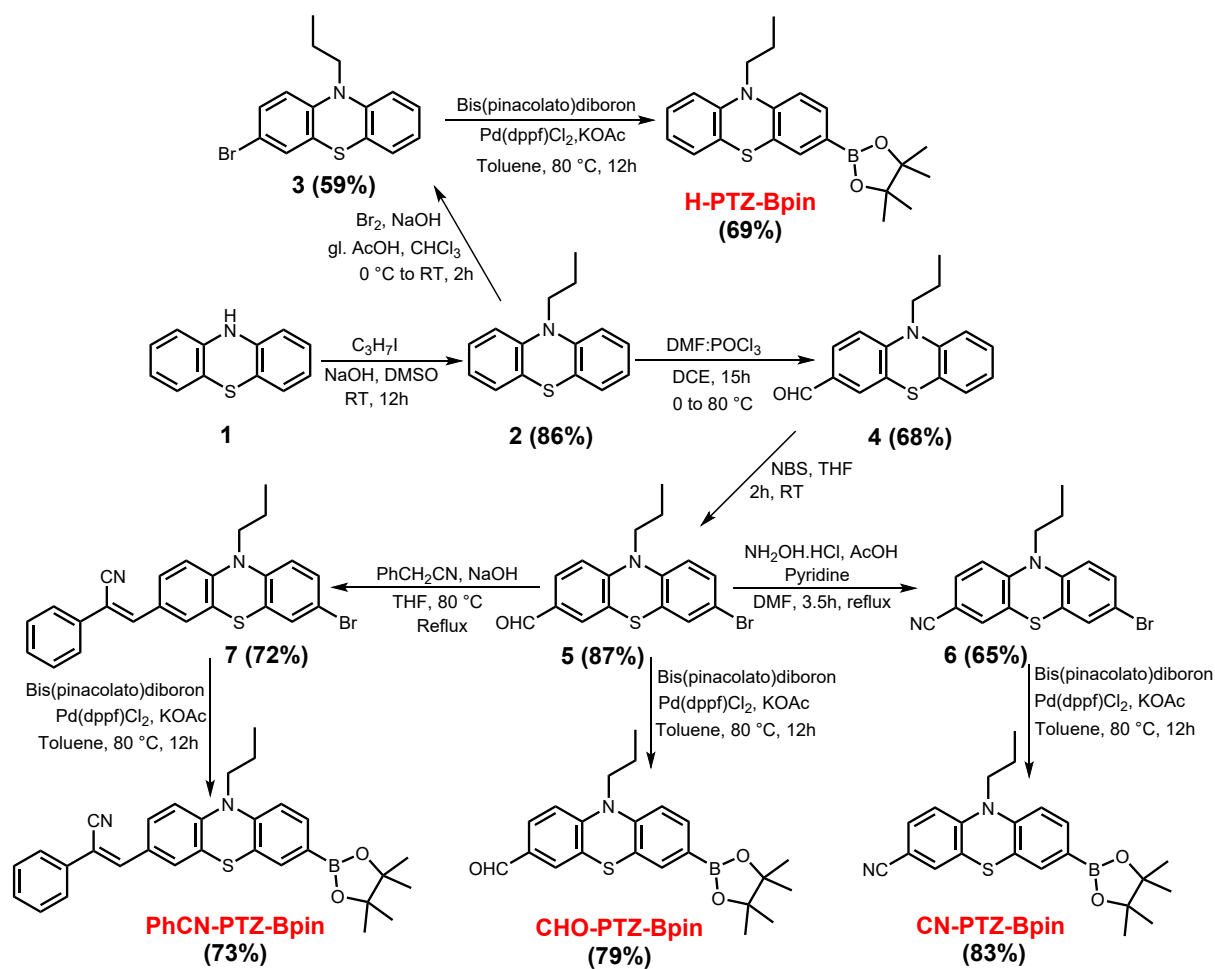

Scheme S1. Synthesis of phenothiazine derivatives **H-PTZ-Bpin**, **CHO-PTZ-Bpin**, **CN-PTZ-Bpin**, and **PhCN-PTZ-Bpin**.

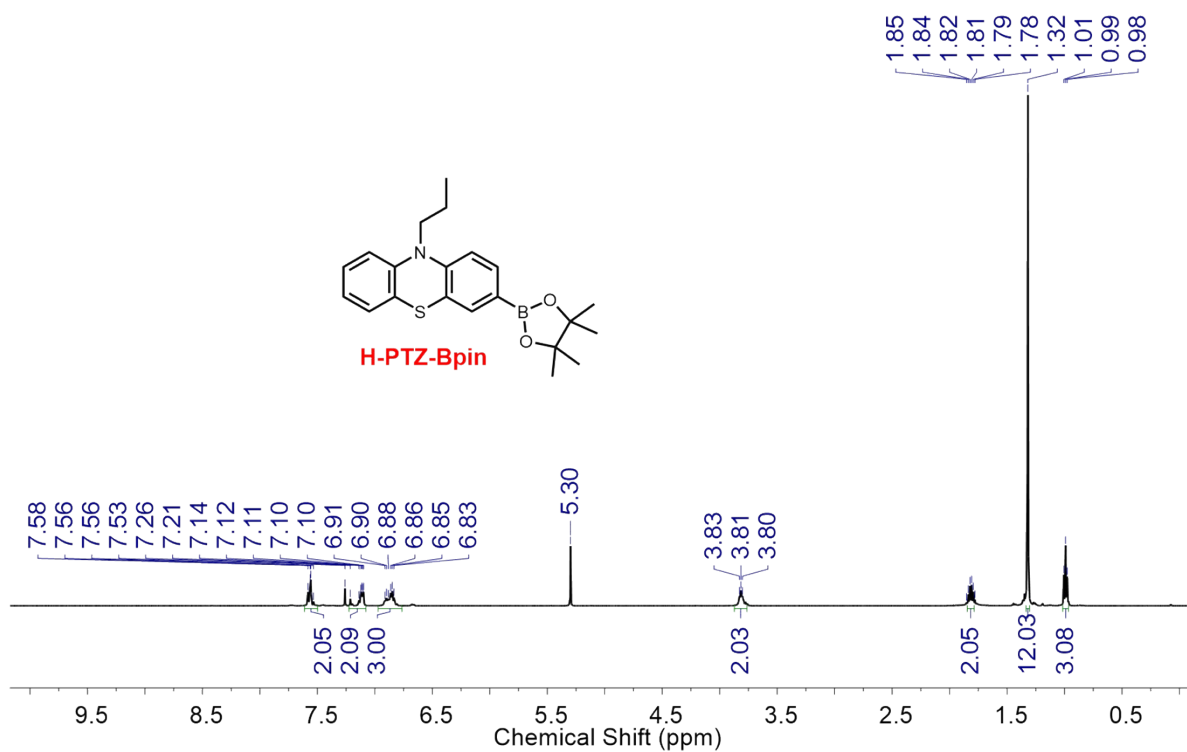

Figure S1.  $^1\text{H}$  NMR of H-PTZ-Bpin ( $\text{CDCl}_3$ , 500 MHz).

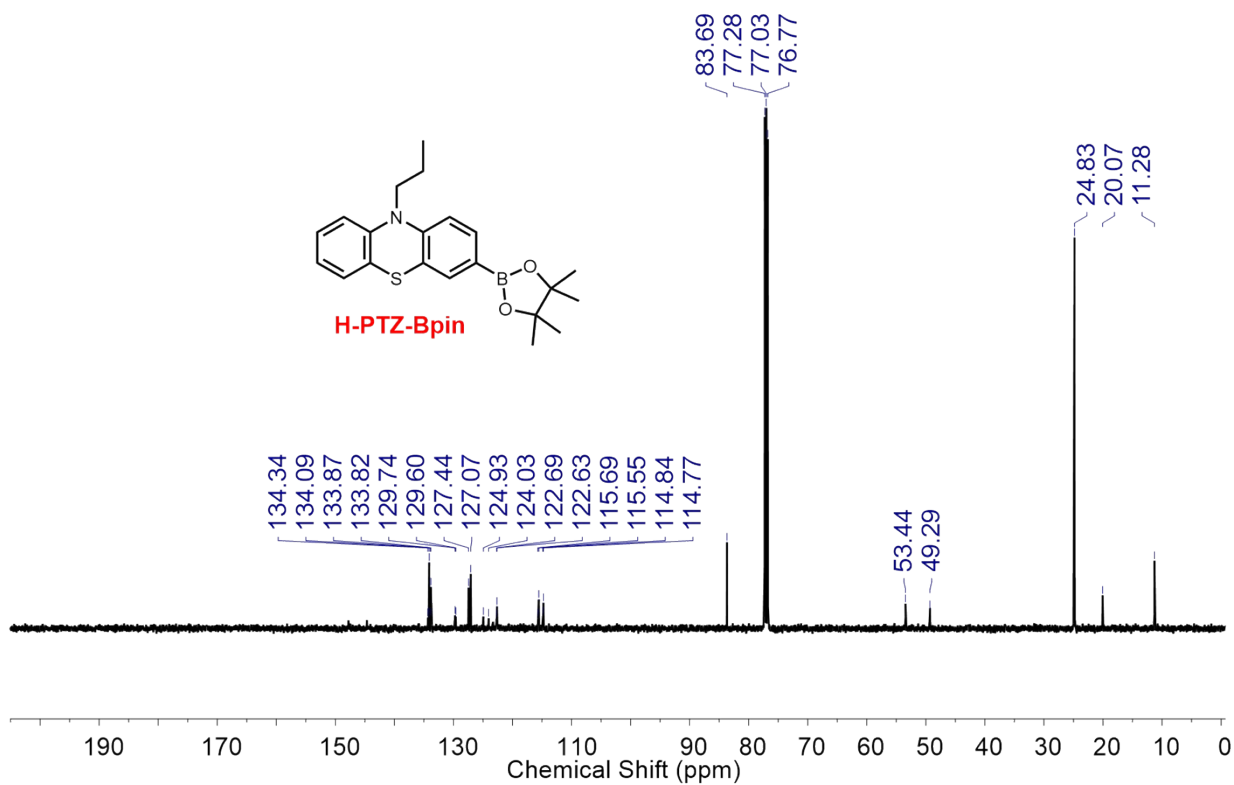

Figure S2.  $^{13}\text{C}\{^1\text{H}\}$  NMR of H-PTZ-Bpin ( $\text{CDCl}_3$ , 126 MHz).

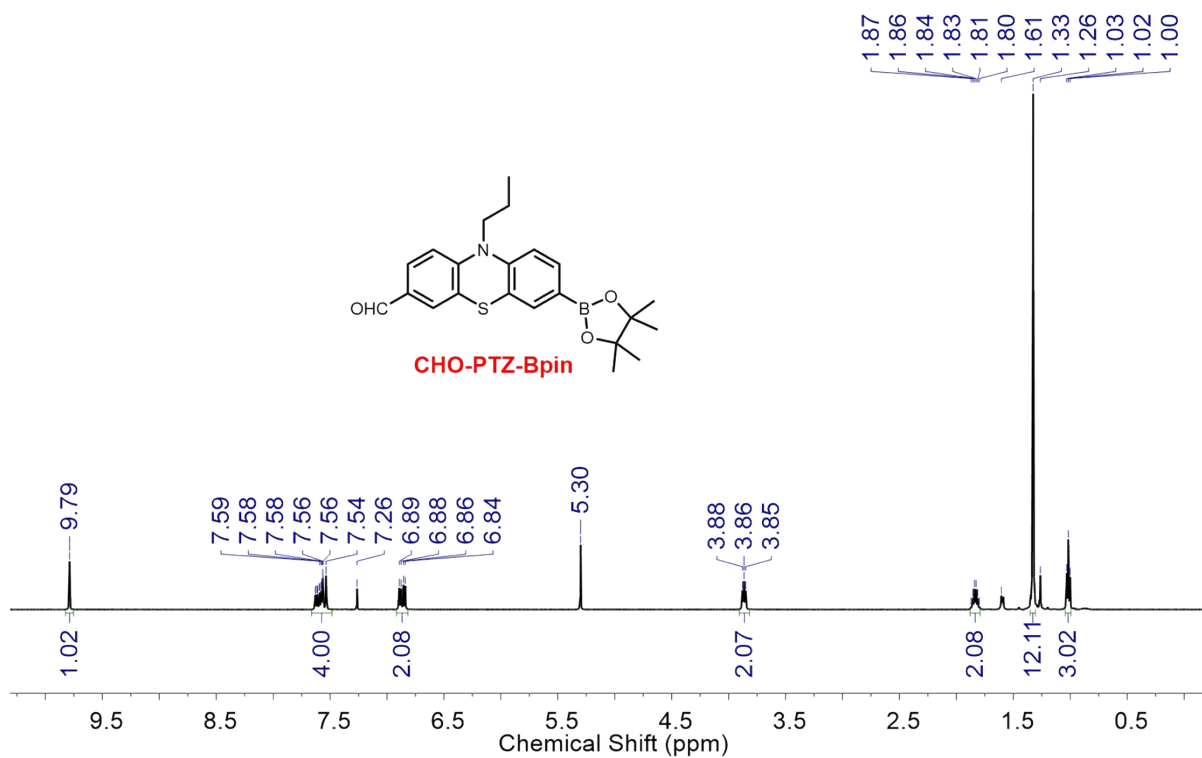

**Figure S3.**  $^1\text{H}$  NMR of CHO-PTZ-Bpin ( $\text{CDCl}_3$ , 500 MHz).

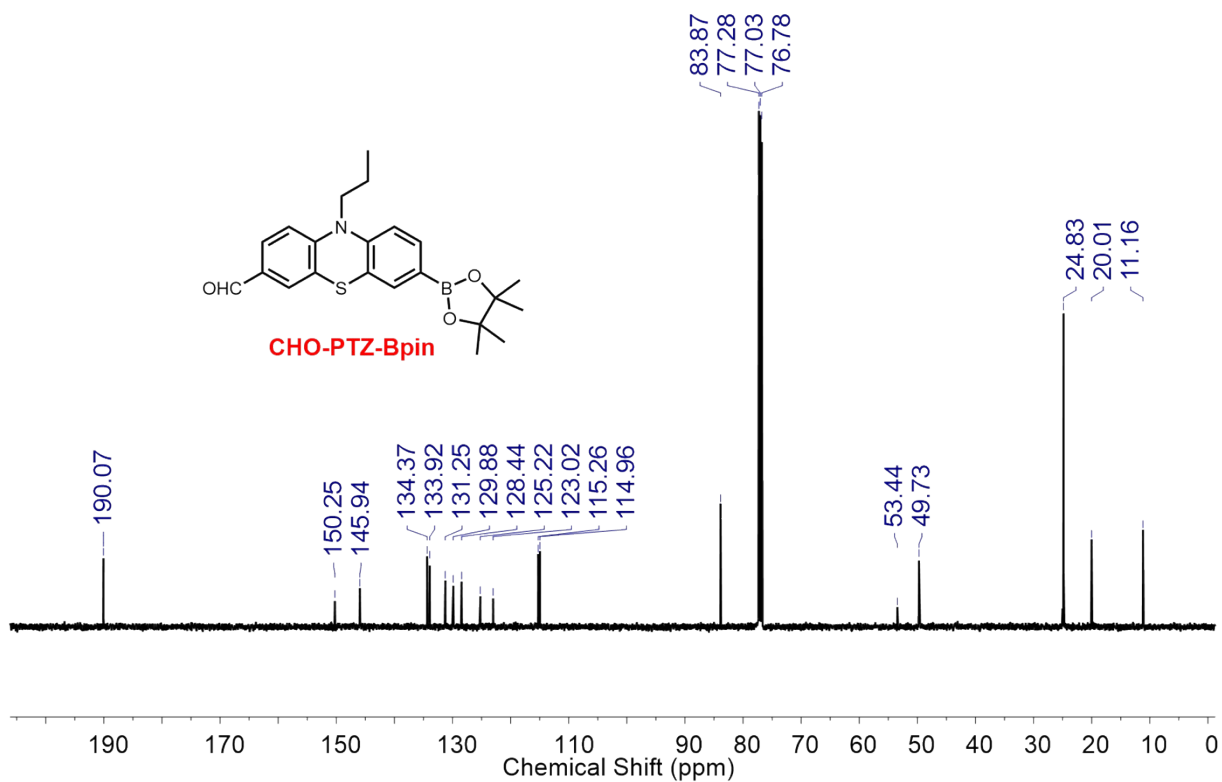

**Figure S4.**  $^{13}\text{C}\{^1\text{H}\}$  NMR of CHO-PTZ-Bpin ( $\text{CDCl}_3$ , 126 MHz).

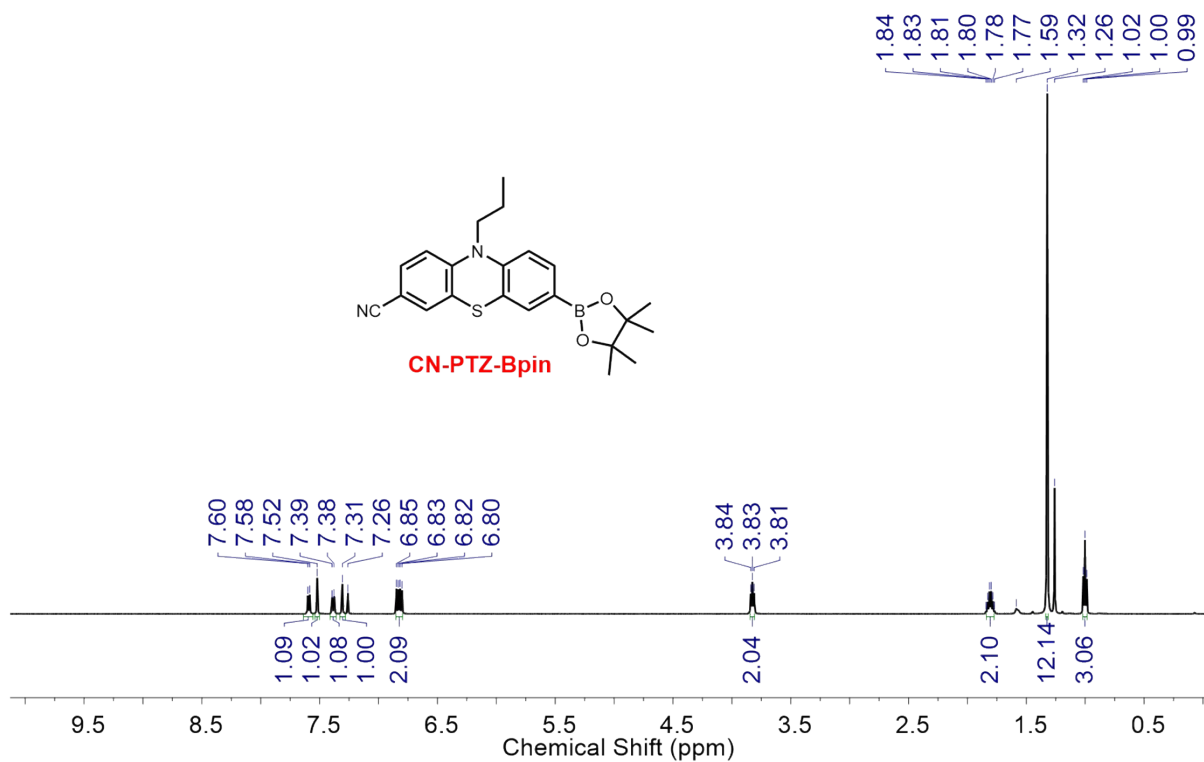

Figure S5.  $^1\text{H}$  NMR of CN-PTZ-Bpin ( $\text{CDCl}_3$ , 500 MHz).

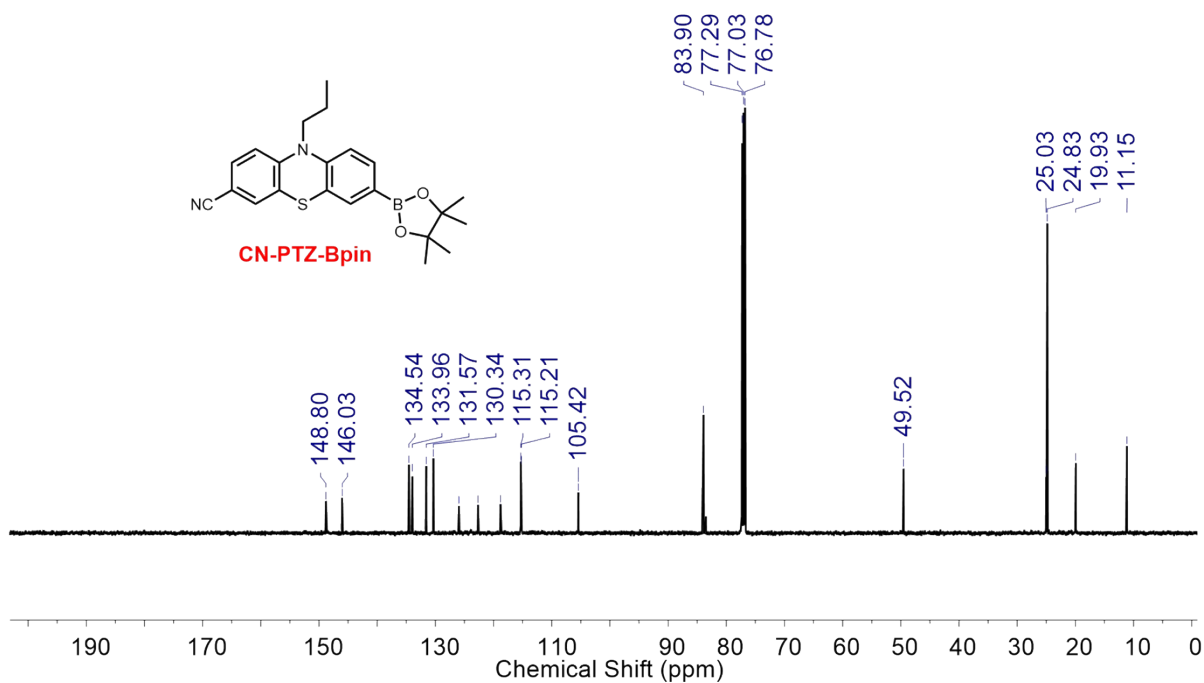

Figure S6.  $^{13}\text{C}\{^1\text{H}\}$  NMR of CN-PTZ-Bpin ( $\text{CDCl}_3$ , 126 MHz).

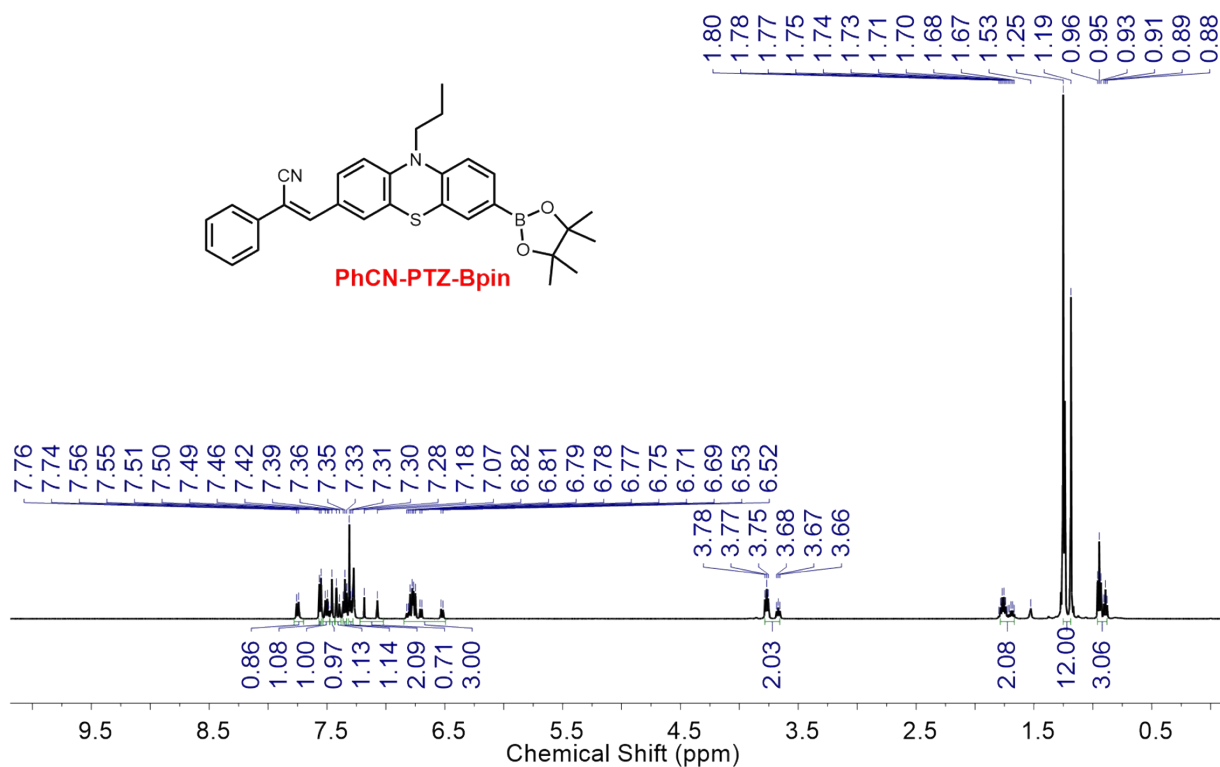

**Figure S7.** <sup>1</sup>H NMR of PhCN-PTZ-Bpin (CDCl<sub>3</sub>, 500 MHz).

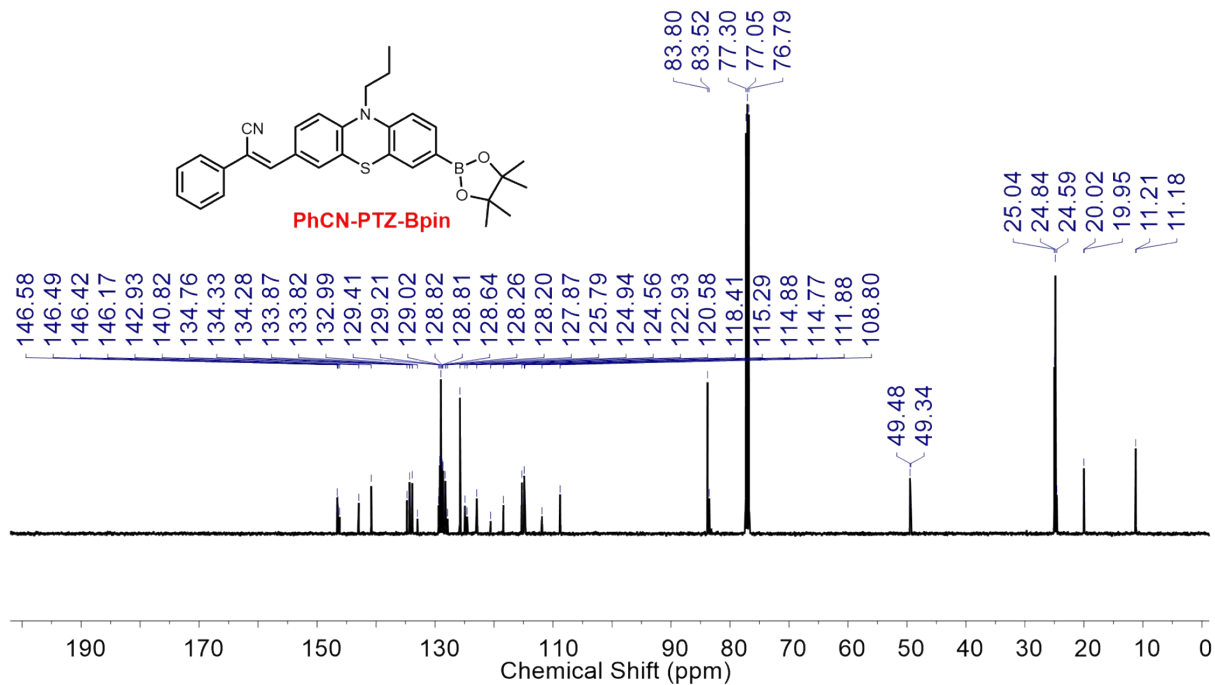

**Figure S8.** <sup>13</sup>C{<sup>1</sup>H} NMR of PhCN-PTZ-Bpin (CDCl<sub>3</sub>, 126 MHz).

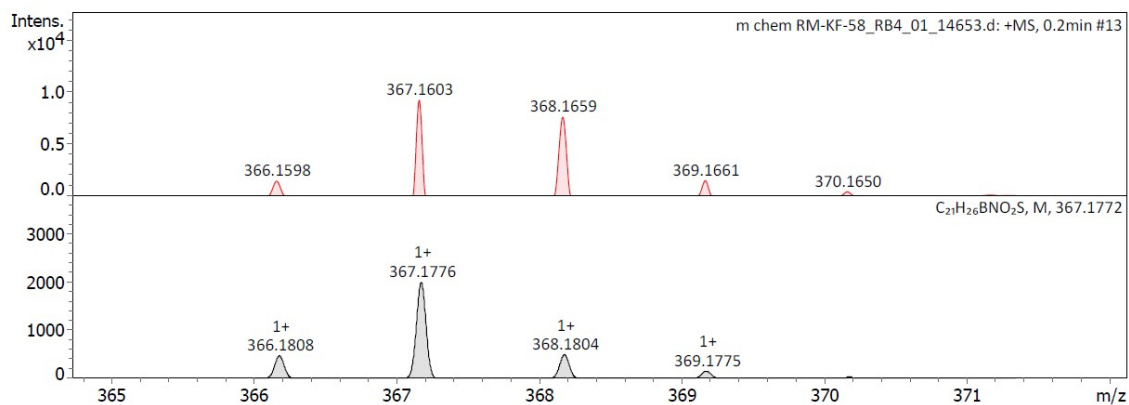

Bruker Compass DataAnalysis 5.1 printed: 24-02-2022 12:17:19 by: Faizal khan Page 1 of 1

**Figure 9. HRMS of H-PTZ-Bpin.**

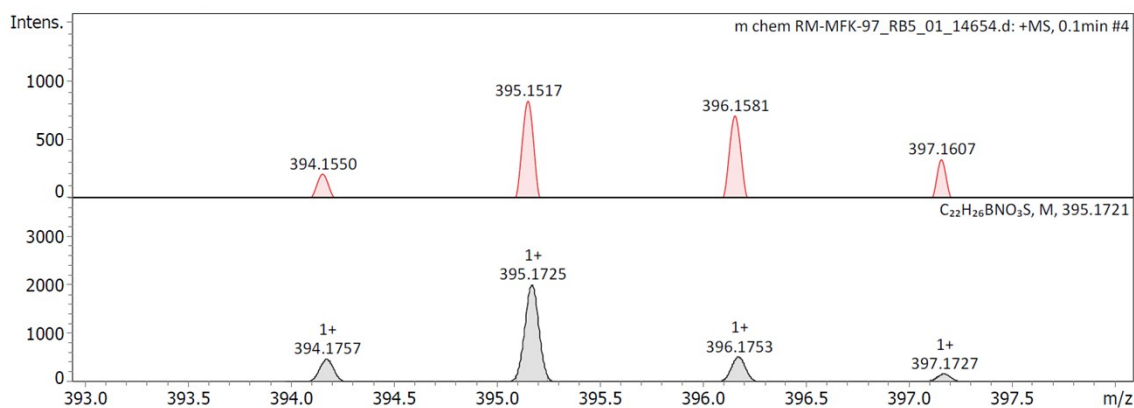

Bruker Compass DataAnalysis 5.1 printed: 24-02-2022 12:21:56 by: Faizal khan Page 1 of 1

**Figure 10. HRMS of CHO-PTZ-Bpin.**

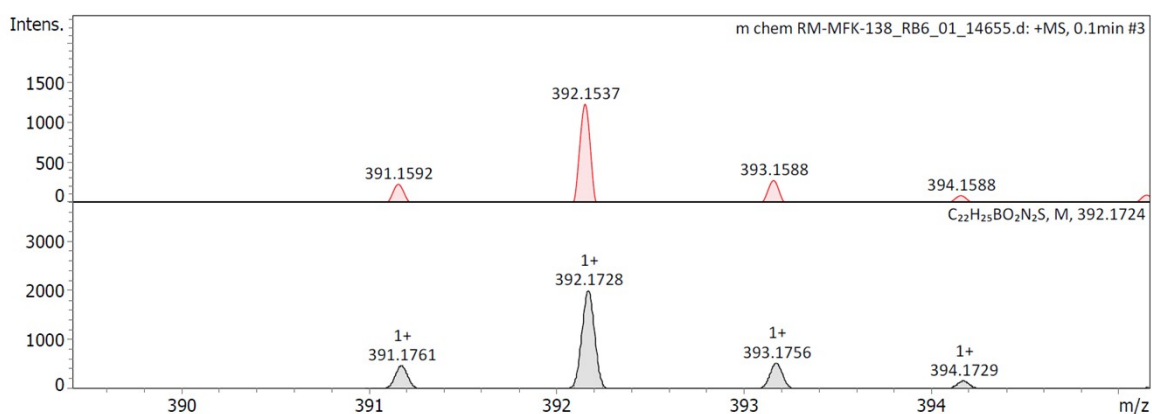

Bruker Compass DataAnalysis 5.1 printed: 24-02-2022 12:24:51 by: Faizal khan Page 1 of 1

**Figure 11. HRMS of CN-PTZ-Bpin.**

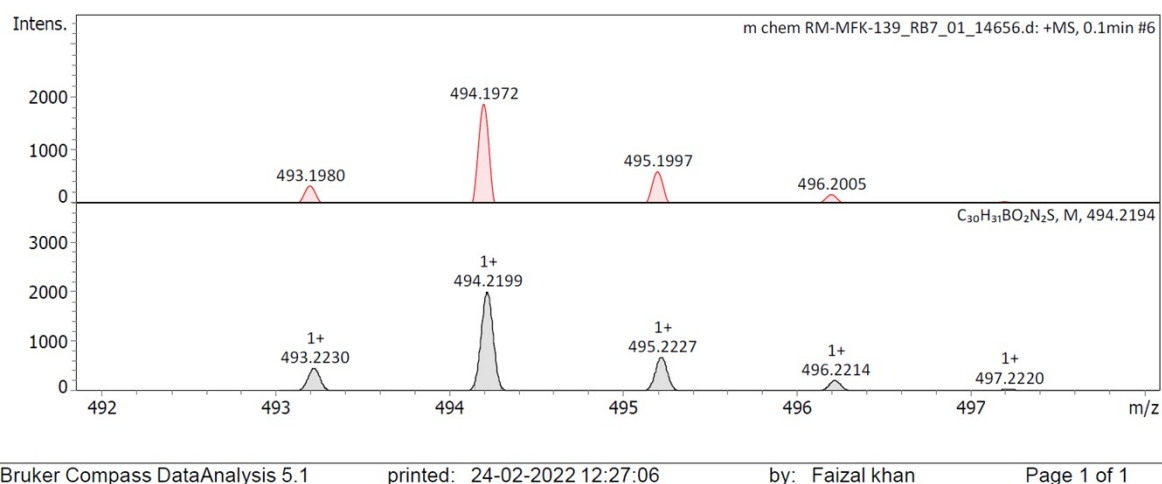

**Figure 12.** HRMS of **PhCN-PTZ-Bpin**.

### Crystallographic data

The crystal and refinement data are summarized in Table S. The CCDC number 2176341 contains the supplementary crystallographic data for **CN-PTZ-Bpin**. These data can be obtained free of charge via [www.ccdc.cam.ac.uk](http://www.ccdc.cam.ac.uk) (or from the Cambridge Crystallographic Data Centre, 12 union Road, Cambridge CB21 EZ, UK; Fax: (+44) 1223- 336-033; or [deposit@ccdc.cam.ac.uk](mailto:deposit@ccdc.cam.ac.uk)). The efficient CH $\cdots$ O, S $\cdots$  $\pi$  and CH $\cdots$ HC interactions were observed between the adjacent molecules which led to the formation of a supramolecular network. The O-atom of boronic ester group in each **CN-PTZ-Bpin** molecule interact with the H-atom of alkyl group of its neighbouring molecule through the CH $\cdots$ O interactions (2.679 Å) which leads to the formation of 1D ordered arrangement of **CN-PTZ-Bpin** (Figure S13a, Figure S14a and c). Similarly, The S-atom of phenothiazine in each **CN-PTZ-Bpin** molecule show S $\cdots$  $\pi$  interactions with the aromatic ring of phenothiazine moiety of its neighbouring molecule forming a slipped stack of **CN-PTZ-Bpin** molecules (Figure 13b, Figure S14b and d). These 1D chains were further linked together by various CH $\cdots$ HC (2.399 Å) intermolecular interactions forming a supramolecular network of **CN-PTZ-Bpin** (Figure 13c, Figure S15). As a result of these strong intermolecular interactions, a stable lattice environment could be established for **CN-PTZ-Bpin**.



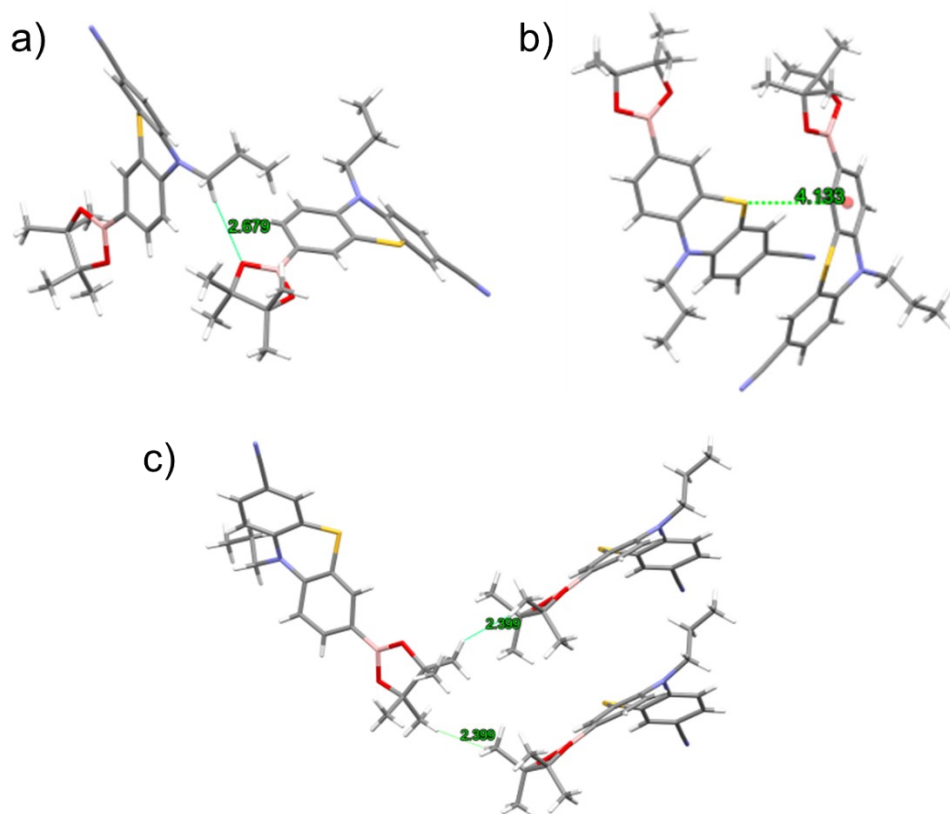

**Figure S13.** Single crystal structure of **CN-PTZ-Bpin** showing intermolecular interactions (a) CH...O, (b) S... $\pi$  and (c) CH...HC.

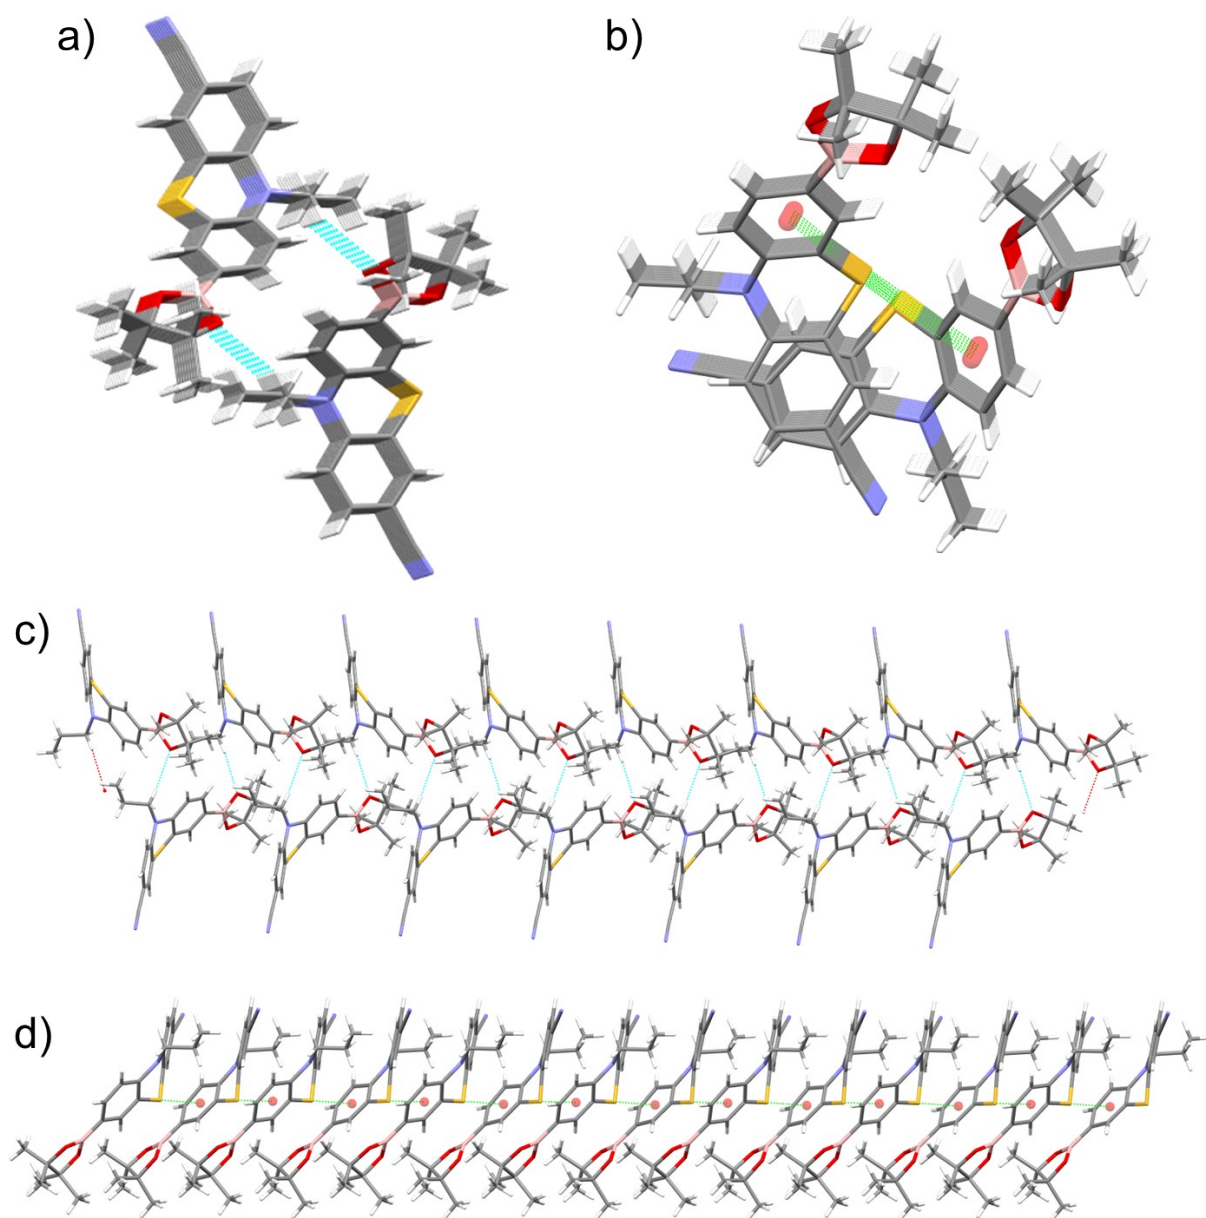

**Figure S14.** (a and c) 1D-arrangement of the molecules of **CN-PTZ-Bpin** interacting through CH...O interactions (2.658 Å); (b and d) A slipped stacked arrangement of the molecules of **CN-PTZ-Bpin** showing S...π interactions.

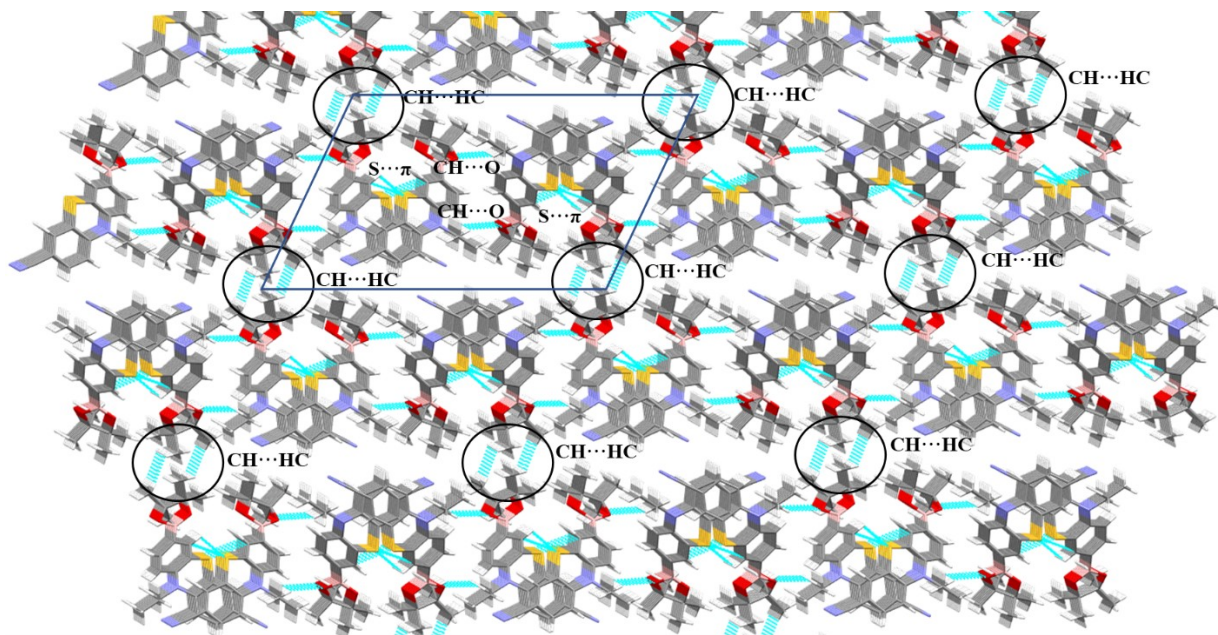

**Figure S15.** Supramolecular network of the molecules of **CN-PTZ-Bpin** in its crystalline lattice showing various intermolecular interactions.

**Table S1** Crystal data and structure refinement for **CN-PTZ-Bpin**.

|                                   |                                                                  |
|-----------------------------------|------------------------------------------------------------------|
| Identification code               | <b>Rm669a</b>                                                    |
| Empirical formula                 | C <sub>22</sub> H <sub>25</sub> BN <sub>2</sub> O <sub>2</sub> S |
| Formula weight                    | 392.31                                                           |
| Temperature                       | 293(2)K                                                          |
| Wavelength                        | 0.71073                                                          |
| Crystal system, space group       | monoclinic, <i>P</i> -2 <sub>1</sub>                             |
| a/(Å)                             | 13.914                                                           |
| b/(Å)                             | 8.045                                                            |
| c/(Å)                             | 20.630                                                           |
| Alpha/(°)                         | 90.00                                                            |
| Beta/(°)                          | 99.42                                                            |
| Gamma/(°)                         | 90.00                                                            |
| Volume                            | 2278.1(11) Å <sup>3</sup>                                        |
| Z, calculated density             | 4, 1.144 g/cm <sup>3</sup>                                       |
| Absorption coefficient            | 0.160 mm <sup>-1</sup>                                           |
| F(000)                            | 832.0                                                            |
| Crystal size                      | 0.33 x 0.26 x 0.21                                               |
| Θ range for data collection/(°)   | 6.356 to 58.804                                                  |
| Reflections collected             | 20439                                                            |
| Independent reflections           | 9886 [R <sub>int</sub> = 0.2214, R <sub>sigma</sub> = 0.4008]    |
| Goodness-of-fit on F <sup>2</sup> | 0.905                                                            |
| Final R indexes [I >= 2σ(I)]      | R <sub>1</sub> = 0.1133, wR <sub>2</sub> = 0.2362                |

Final R indexes [all data]

$R_1 = 0.3913$ ,  $wR2 = 0.3623$

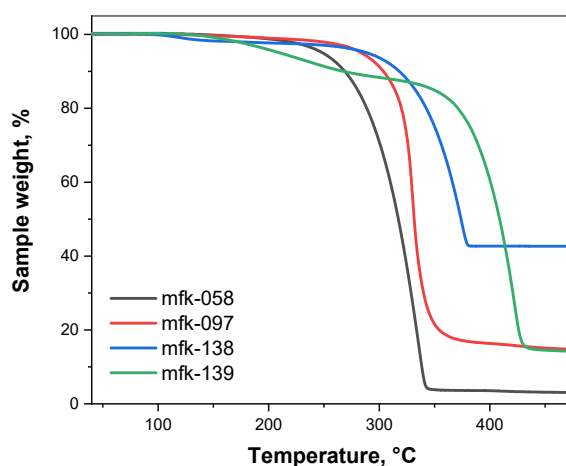

Figure S16. TGA curves of compounds **H-PTZ-Bpin**, **CHO-PTZ-Bpin**, **CN-PTZ-Bpin**, and **PhCN-PTZ-Bpin**.

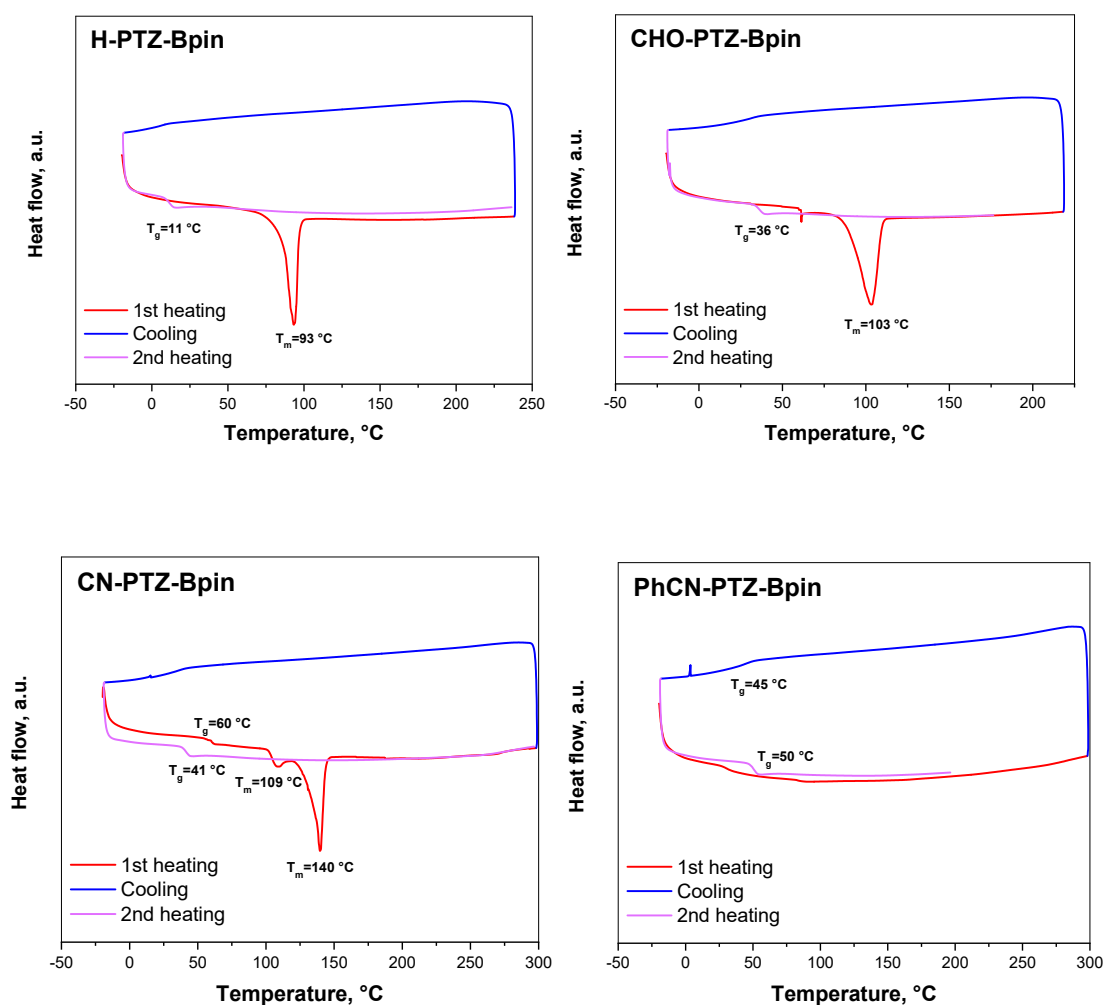

**Figure S17.** DSC curves of compounds **H-PTZ-Bpin**, **CHO-PTZ-Bpin**, **CN-PTZ-Bpin**, and **PhCN-PTZ-Bpin**.

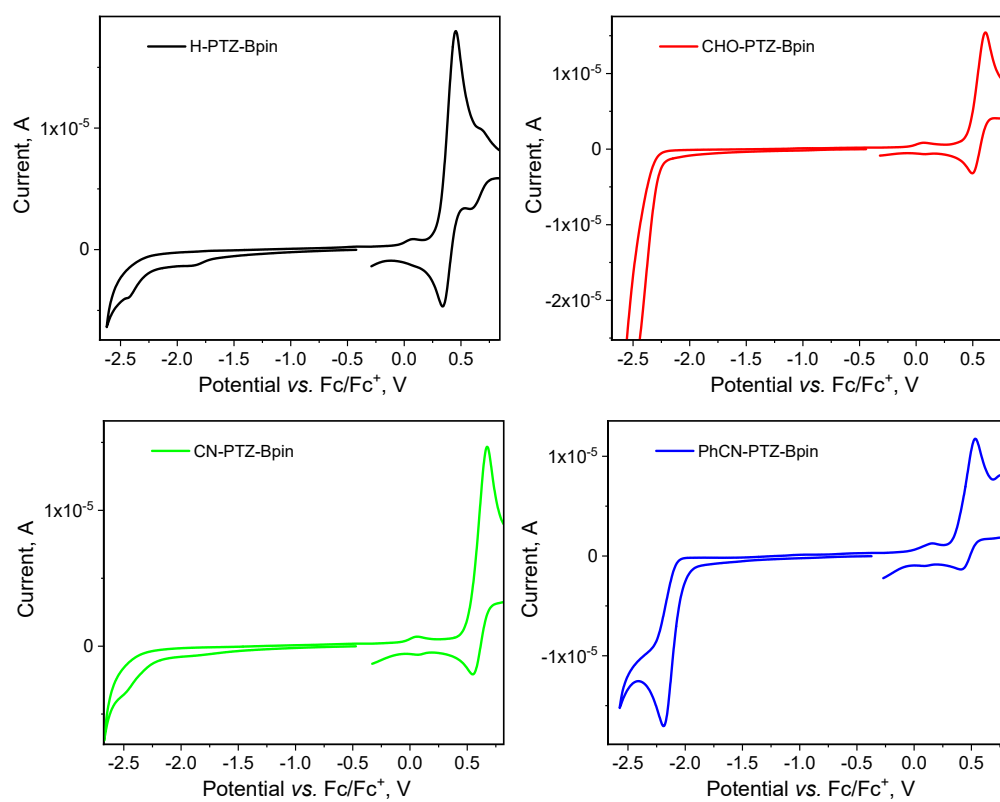

**Figure S18.** Cyclic voltammograms of compounds **H-PTZ-Bpin**, **CHO-PTZ-Bpin**, **CN-PTZ-Bpin**, and **PhCN-PTZ-Bpin**.

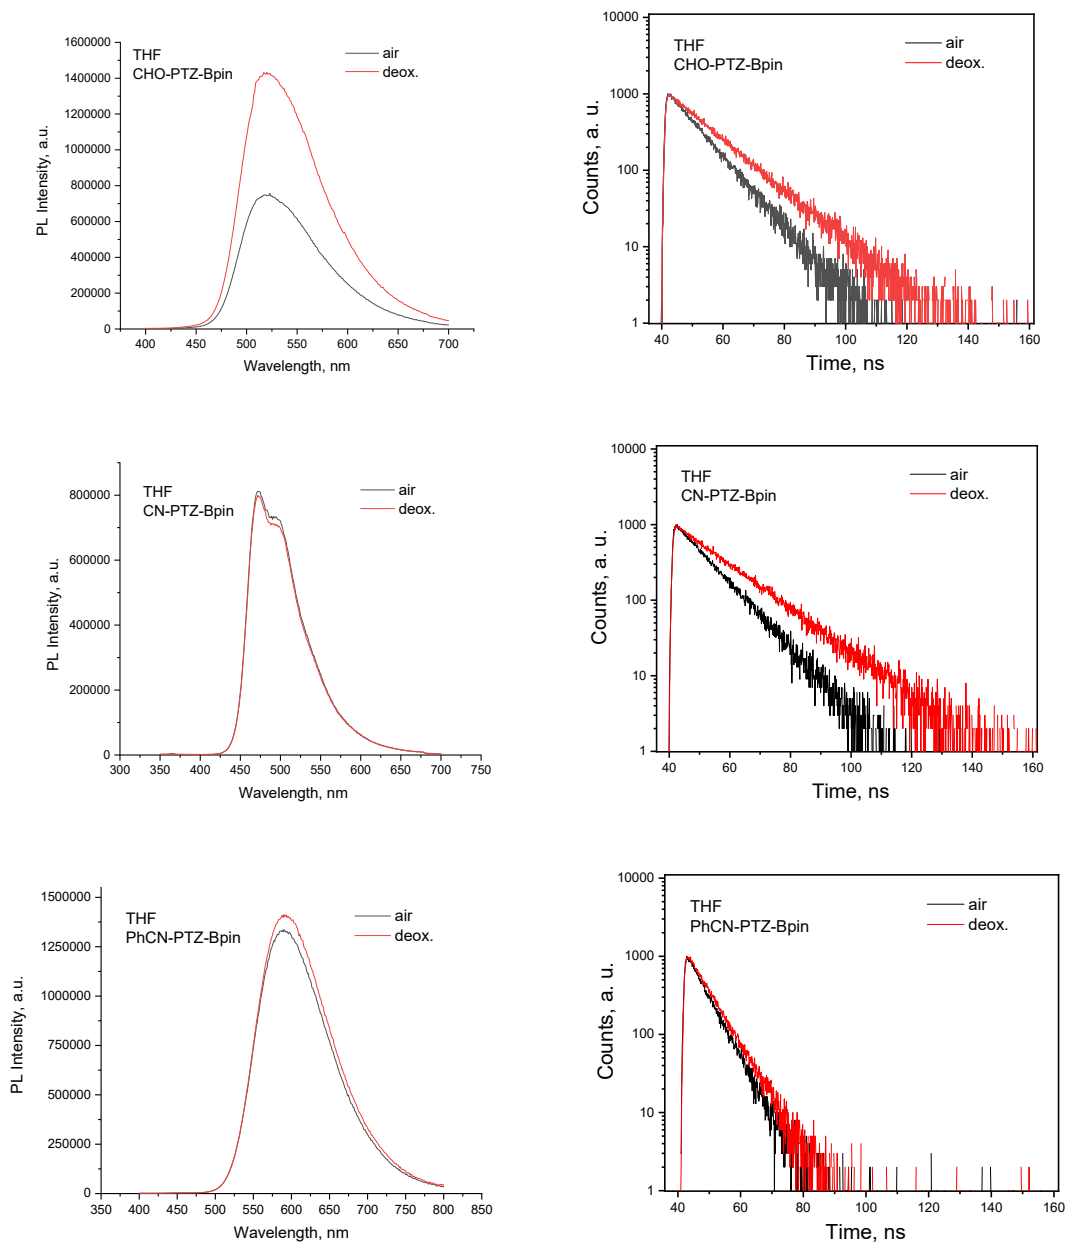

**Figure S19.** PL spectra (left) and PL decay curves (right) of non-deoxygenated (air) and deoxygenated (deo.) THF solutions of **CHO-PTZ-Bpin**, **CN-PTZ-Bpin**, and **PhCN-PTZ-Bpin** at room temperature.

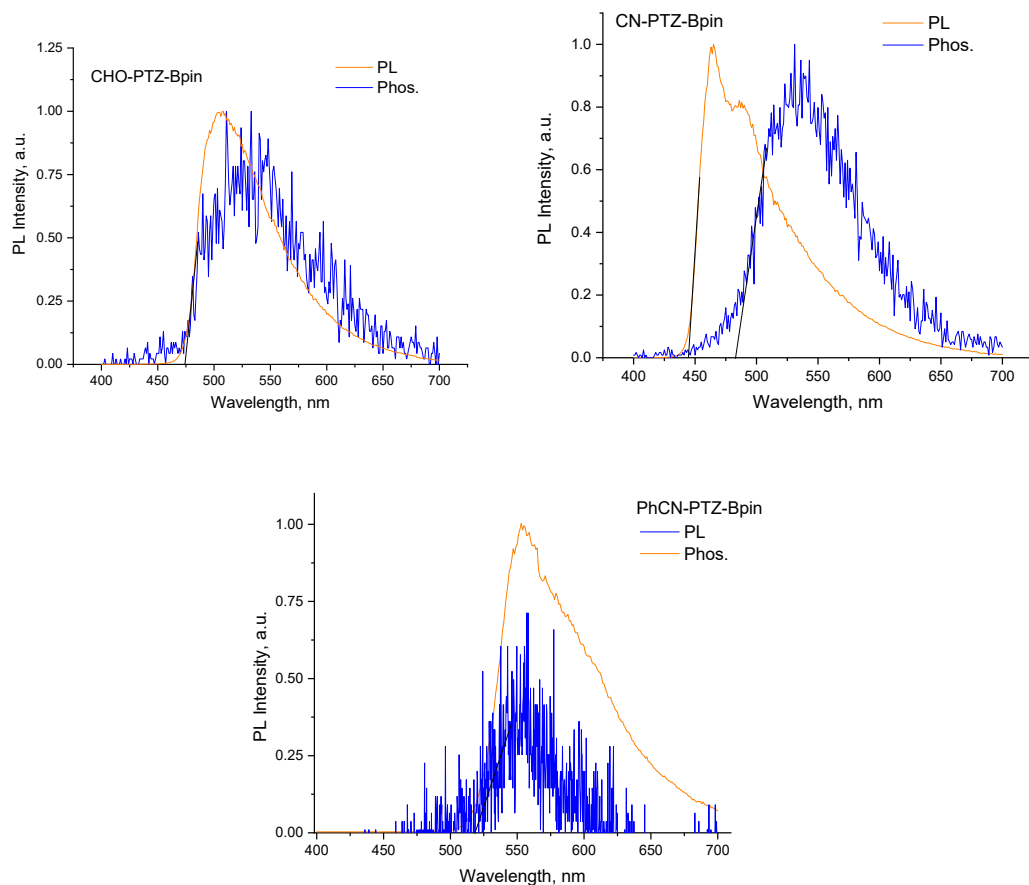

**Figure S20.** PL and phosphorescence spectra of **CHO-PTZ-Bpin**, **CN-PTZ-Bpin**, and **PhCN-PTZ-Bpin** in THF at 77K. Phosphorescence was separated from fluorescence using a delay of 1ms after excitation.



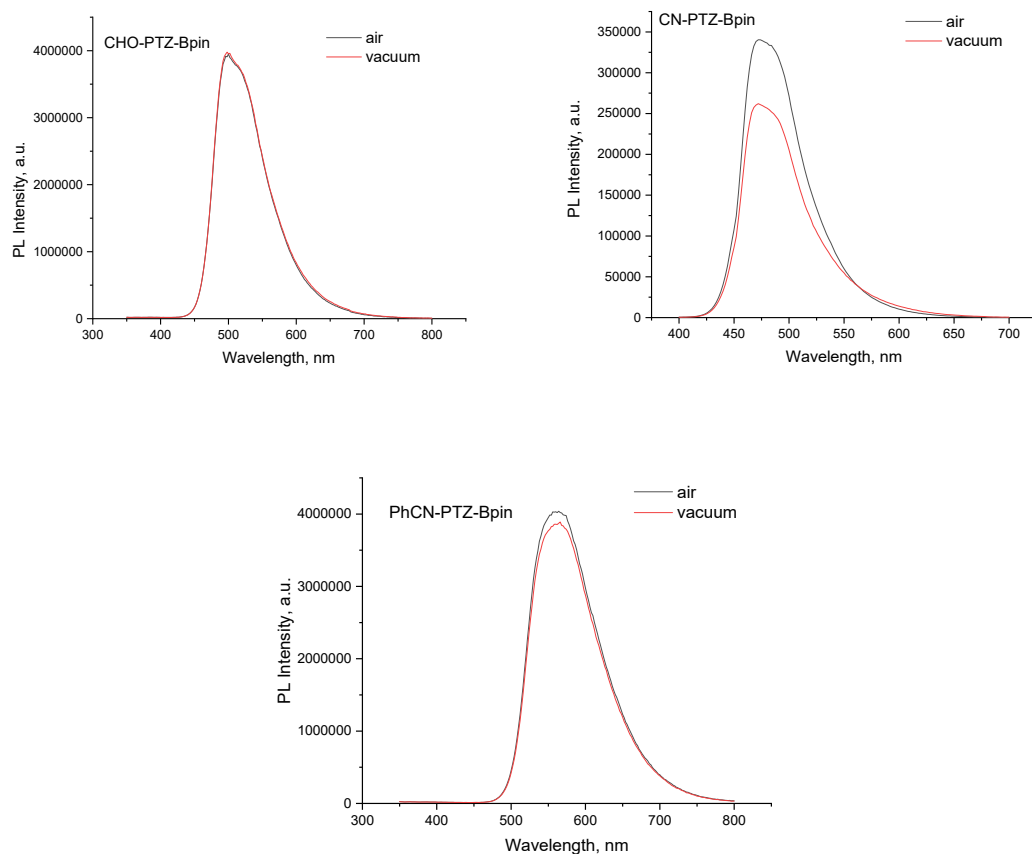

**Figure S21.** PL spectra of low-concentrated (5 wt.%) dispersions of **CHO-PTZ-Bpin**, **CN-PTZ-Bpin**, and **PhCN-PTZ-Bpin** in ZEONEX under air and vacuum at room temperature.
